1 **Shade-induced transcription of PIF-Direct-Target Genes precedes H3K4-trimethylation**  
2 **chromatin modification rises**

3  
4 Robert H. Calderon<sup>1,2,3\*</sup>, Jutta Dalton<sup>1,2</sup>, Yu Zhang<sup>1,2,4</sup>, and Peter H. Quail<sup>1,2</sup>

5  
6 <sup>1</sup>Department of Plant and Microbial Biology, University of California, Berkeley, CA 94720,  
7 USA

8  
9 <sup>2</sup>Plant Gene Expression Center, Agriculture Research Service, US Department of Agriculture,  
10 Albany, CA 94710, USA

11  
12 <sup>3</sup>Umeå Plant Science Centre, Department of Plant Physiology, Umeå University, 901 87 Umeå,  
13 Sweden

14  
15 <sup>4</sup>US Department of Energy, Joint Genome Institute, Lawrence Berkeley National Laboratory,  
16 Berkeley, CA 94720, USA

17  
18 \*Corresponding author: Robert H. Calderon ([robert.calderon@umu.se](mailto:robert.calderon@umu.se))

19  
20 **Running title:** Shade-induced transcription precedes H3K4me3 rise

21  
22

## 23 **Abstract**

24 The phytochrome (phy)-PIF (Phytochrome Interacting Factor) sensory module perceives  
25 and transduces light signals to Direct-Target Genes (DTGs), which then drive the adaptational  
26 responses in plant growth and development, appropriate to the prevailing environment. These  
27 signals include the first exposure of etiolated seedlings to sunlight upon emergence from  
28 subterranean darkness, and the change in color of the light that is filtered through, or reflected  
29 from, neighboring vegetation ('shade'). Previously, we identified three broad categories of  
30 rapidly signal-responsive genes: those repressed by light and conversely induced by shade; those  
31 repressed by light, but subsequently unresponsive to shade; and those responsive to shade only.  
32 Here, we investigate the potential role of epigenetic chromatin modifications in regulating these  
33 contrasting patterns of phy-PIF module-induced expression of DTGs. Using RNA-seq and ChIP-  
34 seq, time-resolved profiling of transcript and histone 3 lysine 4 trimethylation (H3K4me3) levels,  
35 respectively, we show that, whereas the initial dark-to-light transition triggers a rapid, apparently  
36 temporally-coincident decline of both parameters, the light-to-shade transition induces similarly  
37 rapid increases in transcript levels that precede increases in H3K4me3 levels. Together with  
38 other recent findings, these data raise the possibility that, rather than being causal in the shade-  
39 induced expression changes, H3K4me3 may function to buffer the rapidly fluctuating shade/light  
40 switching that is intrinsic to vegetational canopies under natural sunlight conditions.

## 41 **Introduction**

42 All organisms must perceive, process and react to environmental cues in order to survive  
43 and pass their genetic material onto the next generation. Land plants in particular, given their  
44 sessile lifestyle, must quickly perceive these environmental signals and respond accordingly.  
45 One particularly well-studied plant signaling system is the phytochrome (phy) family of  
46 photoreceptors (phyA to phyE in Arabidopsis), a set of red (R) and far red (FR) light-absorbing  
47 chromoproteins that transduce light signals into large-scale changes in gene expression  
48 (Tepperman et al., 2001). Upon absorption of R light, the inactive form of the phy molecule (Pr)  
49 is photoconverted into the active form (Pfr) which quickly translocates from the cytoplasm to the  
50 nucleus, initiating downstream developmental programs, directed by these expression changes  
51 (Sakamoto and Nagatani, 1996).

52 Experimental evidence indicates that a critical link between these downstream programs  
53 and the phy molecules is a subfamily of eight bHLH transcription factors called phy-interacting  
54 factors (PIFs) (Ni et al., 1998; Huq and Quail, 2002; Monte et al., 2004; Leivar and Quail, 2011;  
55 Pham et al., 2018). The PIFs, in particular PIF1, PIF3, PIF4 and PIF5 (called the PIF quartet),  
56 form a set of partially functionally redundant proteins that bind to a consensus sequence in the  
57 upstream region of target genes, regulating their transcriptional output (Leivar et al., 2009). The  
58 PIF quartet has been shown to physically interact specifically with the Pfr form of phytochrome  
59 B (phyB), which subsequently induces phosphorylation, ubiquitination and degradation of the  
60 transcription factor (Ni et al., 2013; 2014; 2017), thereby triggering global changes in target gene  
61 expression (Leivar et al., 2009; Leivar and Quail, 2011; Pham et al., 2018). In addition to the PIF  
62 quartet, PIF6 and PIF7 have also been shown to function in phyB signaling, with PIF7 in  
63 particular serving as a key regulator of auxin biosynthesis during the shade-avoidance response  
64 (Khanna et al., 2004; Leivar et al., 2008; Li et al., 2012). The integration of several genome-wide  
65 analyses of PIF-binding and PIF-mediated transcriptional regulation (Leivar et al., 2009;  
66 Hornitschek et al., 2012; Leivar et al., 2012; Oh et al., 2012) has led to the discovery of over 300

68 Direct Target Genes (DTGs) that are directly, transcriptionally regulated by PIFs (Zhang et al.,  
69 2013; Pfeiffer et al., 2014).

70 The relative abundance of the Pfr and Pr forms of the phyB molecule, and by extension  
71 the accumulation and activity of the PIFs, is determined by the ratio of red to far-red light in the  
72 immediate environment. The active Pfr form is favored under white-light illumination where the  
73 R/FR ratio is high, whereas the inactive Pr form is favored in the dark and in conditions where  
74 the R/FR ratio is low, such as under vegetative shading (Quail et al., 1995). As a consequence of  
75 the photoreversible nature of the phyB molecule, PIF accumulation and activity is high in  
76 darkness and in the shade. The transcriptional responses of many PIF DTGs, however, do not  
77 exhibit a photoreversible pattern (Leivar et al., 2012).

78 In a previous study, we were able to categorize the transcriptional responses of PIF DTGs  
79 in tothree distinct patterns: those that respond during the transition from the etiolated dark-grown  
80 state to R, those that respond during the transition from white light into simulated shade or those  
81 that respond during both transitions (Leivar et al., 2012). The differential responsiveness of these  
82 three broad sets of PIF DTGs, indicates that PIF abundance is not the sole determinant of PIF  
83 DTG expression. Core components of the plant circadian oscillator have been implicated in  
84 modulating some of these changes in gene expression (Martín et al., 2018; Zhang et al., 2020).  
85 Most recently, changes in the chromatin environment have been shown to be directly involved in  
86 triggering shade-induced transcription (Willige et al., 2021).

87 One form of chromatin remodeling that can modulate the transcriptional output of light-  
88 regulated genes involves the enzymatic modification of histones (Fisher and Franklin, 2011;  
89 Perrella and Kaiserli, 2016; Bourbousse et al., 2019; Martínez-García and Moreno-Romero,  
90 2020). Methylation, acetylation and/or ubiquitination of histones have all been shown to regulate  
91 transcription of light-regulated genes (Charron et al., 2009; Bourbousse et al., 2012; Liu et al.,  
92 2013). Unique histone modification patterns at the promoters of individual PIF DTGs have the  
93 potential to underly the differential responsiveness of PIF DTGs under different environmental  
94 conditions. The accumulation of one particular mark, histone 3 lysine 4 trimethylation  
95 (H3K4me3), at the transcriptional start site (TSS) of genes has long been known to strongly  
96 correlate with transcriptional activity of those genes (Bernstein et al., 2002), but the biological  
97 function of this mark remains relatively less-well defined (Fiorucci et al., 2019). Proposed roles  
98 include facilitating transcriptional elongation (Ding et al., 2012) or serving as "transcriptional  
99 memory" (Liu et al., 2014)

100 Here, we have refined the list of PIF DTGs by integrating previously published ChIP  
101 binding and RNA-seq data for the PIF quartet, with newly obtained RNA-seq data from both  
102 wild-type and a mutant lacking six of the PIFs (PIF1, 3, 4, 5, 6 and 7). Using this system, we  
103 have explored the potential role of the epigenetic mark H3K4me3 in mediating the observed  
104 differential patterns of expression of PIF DTGs. Our data suggest a possible functional role for  
105 H3K4me3 in stabilizing the expression levels of DTGs in established green plants, against the  
106 rapidly switching light/shade transitions that occur naturally in leaf canopies.

107  
108

## 109 **Results**

### 110 **Characterization of *pifqipif6pif7* sextuple mutant**

111 The *pif1pif3pif4pif5* quadruple mutant (hereafter *pifq*) displays a constitutively  
112 photomorphogenic phenotype when grown in darkness, indicating that these four PIFs are  
113 necessary and sufficient to control de-etiolation in response to R (Leivar et al., 2008; Leivar et  
114 al., 2009). The *pifq* mutant does not, however, exhibit a complete lack of responsiveness to  
115 simulated shade (**Figure 1**), supporting the hypothesis that additional factors are required for the  
116 complete shade avoidance response (Leivar et al., 2012). PIF7 has been implicated in playing a  
117 major role in regulating this process (Li et al., 2012; de Wit et al., 2015; Mizuno et al., 2015)  
118 with the quintuple *pifqipif7* mutant reported to show no statistically-significant shade avoidance  
119 response (Zhang et al., 2020).

120 However, when we measured the shade avoidance response in the *pifqipif7* mutant under  
121 slightly different conditions to Zhang et al. (Zhang et al., 2020), we were still able to detect a  
122 small, yet statistically-significant ( $p < 0.05$ ) residual shade avoidance response (**Figure 1**). A  
123 possible reason for this small difference is that the results presented here were obtained on 2-  
124 day-old seedlings exposed to simulated shade, whereas our previous experiments were  
125 performed on 3-day-old seedlings exposed to simulated shade. Alternatively, this minor residual  
126 shade-avoidance response observed under our conditions could be due to the presence of yet  
127 other members of the PIF-subfamily, such as PIF8 or PIL1 (PIF2) (Leivar and Quail, 2011;  
128 Pham et al., 2018), or to other light-responsive transcription factors. Nevertheless, we then tested  
129 whether PIF6 might be responsible for this residual response by generating a sextuple  
130 *pifqipif6pif7* (*pifS*) mutant and measuring its hypocotyl length in response to simulated shade.  
131 This sextuple mutant displayed significantly shorter hypocotyls than the wild-type in response to  
132 shade, but no significant decrease relative to the *pifqipif7* quintuple mutant (**Figure 1**). These  
133 results suggest that PIF6 plays no significant role in mediating the shade-avoidance response,  
134 consistent with its proposed role in seed dormancy and development (Penfield et al., 2010).

135

### 136 **Generation of a high-confidence list of PIF DTGs and subcategorization into E, ES and S** 137 **classes**

138 Many PIF direct target genes (DTGs) have been previously observed to be upregulated in  
139 the presence of the PIFs while others are downregulated. For the purposes of this study, we  
140 focused only on PIF-induced genes (*i.e.* those genes which appear to require the PIFs for high  
141 levels of transcription) because PIFs have been shown to have intrinsic activating activity (Huq  
142 et al., 2004; Al-Sady et al., 2008; de Lucas et al., 2008; Dalton et al., 2016).

143 In brief, we first integrated the data from a previously published RNA-seq experiment on  
144 dark-grown seedlings exposed to 1h of R light (Pfeiffer et al, 2014) with a new RNA-seq time-  
145 course experiment of white light (WL)-grown seedlings exposed to 3h of simulated shade  
146 (shade-light). We then combined previously published RNA-seq data from the *pifq* mutant  
147 grown in darkness (Pfeiffer et al., 2014), with new RNA-seq data, that were obtained using the  
148 *pifqipif6pif7* mutant (*pifS*) grown in WL and exposed to 3h shade-light. Lastly, we used  
149 previously published data to identify those genes whose promoters were found to be bound by  
150 PIF1, PIF3, PIF4, PIF5 and/or PIF7 (no genome-wide binding data are available for PIF6)  
151 (Hornitschek et al., 2012; Oh et al., 2012; Zhang et al., 2013; Pfeiffer et al., 2014; Chung et al.,  
152 2020). By selecting only the genes that met all three of our criteria (light-responsiveness, PIF-  
153 dependence and PIF-binding), we obtained 169 candidate PIF-induced, red-light repressed and/or  
154 shade-light-induced DTGs (**Table 1**).

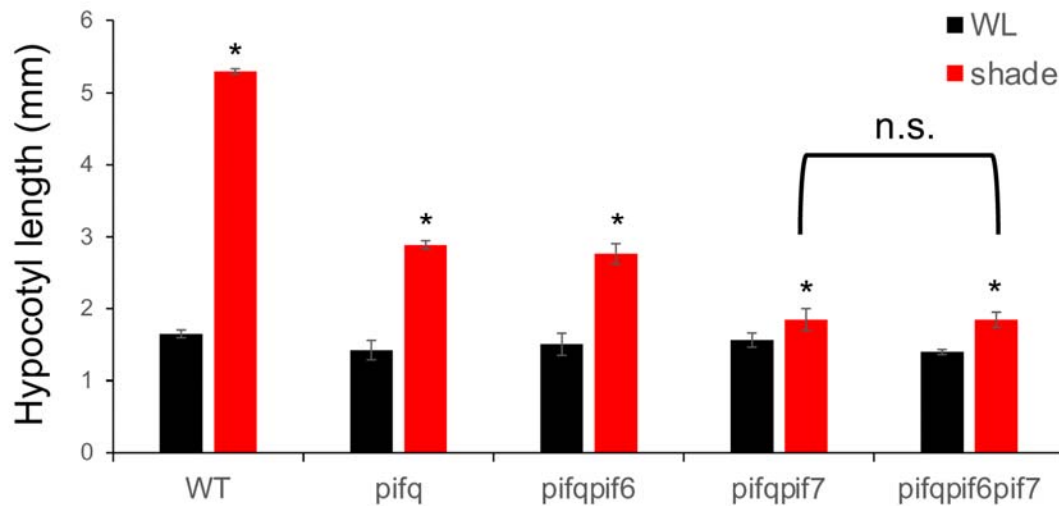

**Figure 1. Phenotypic analysis of higher-order *pif* mutants in response to simulated shade.** Hypocotyl lengths of wild-type (WT), *pifq*, *pifqipif6*, *pifqipif7* and *pifqipif6pif7* mutants grown for 6 days in white light (WL) or 2 days in WL followed by 4 days in simulated shade (shade). Data represent the mean and SE from 3 biological replicates of 30 seedlings per genotype. Asterisks indicate that the hypocotyl lengths of shade-treated seedlings are statistically significantly different from the corresponding WLc controls by Student's t test ( $P < 0.05$ ). n.s. indicates “not significantly different” ( $P > 0.99$ ).

155 As described in Leivar *et al.* (Leivar *et al.*, 2012), PIF DTGs may be broadly classified  
156 into one of three classes: re-labeled here as E, ES and S (E for **E**tiolation-induced only; ES for  
157 both **E**tiolation- and **S**hade-induced; and S for **S**hade-induced only) (**Figure 2**). We therefore  
158 subdivided our combined 169 shade-light-induced and red-repressed PIF DTGs into these classes  
159 based on their patterns of expression during the D to R, and WL to shade-light transitions. Using  
160 these criteria, our initial list of 169 genes was found to contain 24 E genes, 17 ES genes and 128  
161 S genes (**Table 1**). Upon further analysis, we removed 25 genes that exhibited various  
162 anomalous expression profiles and resorted the remaining 144 genes using relaxed cutoff criteria.  
163 This resulted in a redistribution between the classes so that the final numbers of genes in each  
164 class were: 17 E genes, 56 ES genes and 71 S genes (**Table 1**).

165

### 166 **Examination of potential epigenetic regulation of DTGs**

167 We next tested our hypothesis that the variation in transcriptional responses of the PIF-  
168 activated DTGs to darkness and shade might be due to differences in histone tail modifications.  
169 One histone mark, H3K27me3, has already been linked to light-mediated transcriptional  
170 repression (Charron *et al.*, 2009). Because we were focused on loci at which PIFs act as  
171 transcriptional activators, we sought to examine the levels of a histone mark associated with  
172 active transcription. One such mark, H3K4me3 is both correlated with actively transcribed genes  
173 (Bernstein *et al.*, 2002) and inversely correlated with H3K27me3 levels (Zhang *et al.*, 2009). We  
174 therefore chose to assay H3K4me3 levels at the transcriptional start sites (TSS) of E, ES and S  
175 genes by ChIP-seq. We measured H3K4me3 levels in dark-grown seedlings and in WL-grown

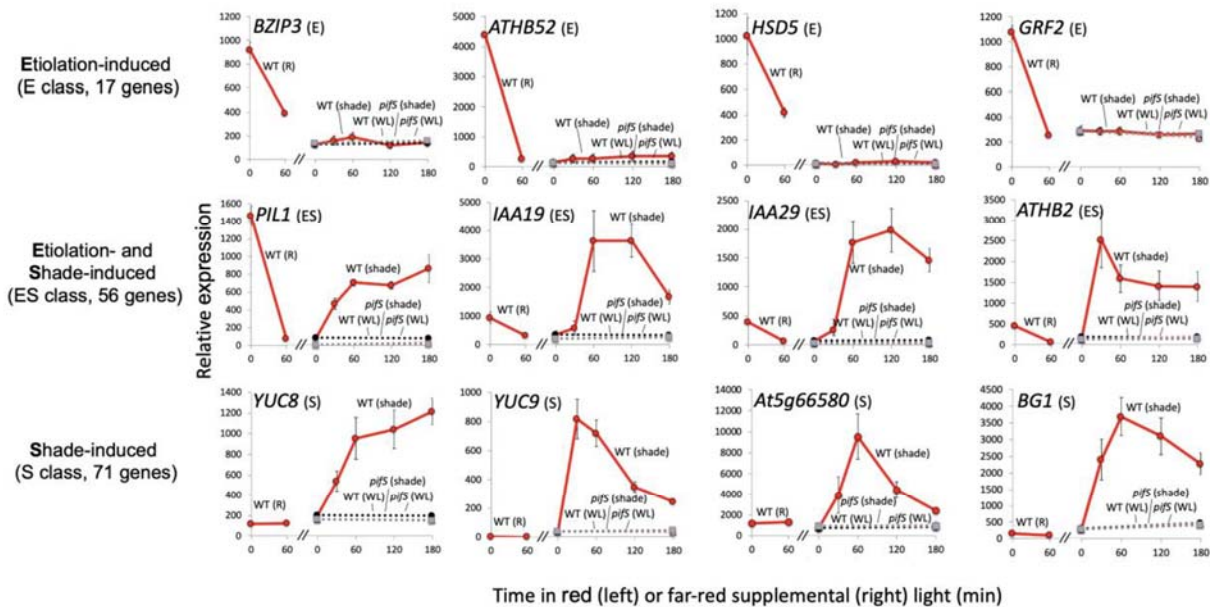

**Figure 2: PIF-activated direct target genes (DTGs) can be subdivided into three categories based on their responses to red light and simulated shade.** Examples of transcript time course profiles for Etiation-induced only (E) genes (*BZIP3*, *ATHB2*, *HSD5* and *GRF2*), Etiation and Shade-induced (ES) genes (*PIL1*, *IAA19*, *IAA29* and *ATHB2*) and Shade-induced only (S) genes (*YUC8*, *YUC9*, *At5g02865* and *BG1*) class genes. Left subpanel shows the effect of 60 min red light on the transcript levels in 3-day-old dark-grown seedlings (wild-type, solid red line). Right subpanel shows the effect of 30, 60, 120 and 180 min of FR-enriched WL or continuous WL on transcript levels in 3-day-old WL-grown seedlings (wild-type, FR: solid red line; *pifS*, FR: dotted black line; wild-type, WL: dotted red line; *pifS*, WL: dotted gray line). Error bars indicate SE.

176 seedlings after exposure to 0, 30, 60, 120 and 180 min of simulated shade, and after 180 min of  
 177 further retention in WL. We also measured H3K4me3 levels in WL-grown *pifS* seedlings after 0  
 178 and 180 min of simulated shade and after 180 min of continued WL.

179 As expected, H3K4me3 levels for E class genes were higher in D than in WL and  
 180 simulated shade (**Figure 3**). On average, H3K4me3 levels for ES and S class genes increase over  
 181 the course of the shade treatment and this increase is attenuated in the *pifS* mutant (**Figure 4**). In  
 182 both classes, however, the increase only occurs after 60 minutes of FR, while an increase in  
 183 transcript level abundance is already visible after 30 minutes of FR. Both classes also exhibit a  
 184 transient reduction in H3K4me3 levels after 30 minutes of FR. Collectively, these data indicate  
 185 that the shade signal induces a transcriptional response prior to the induction of increased H3K4  
 186 trimethylation in these DTGs.

187  
 188

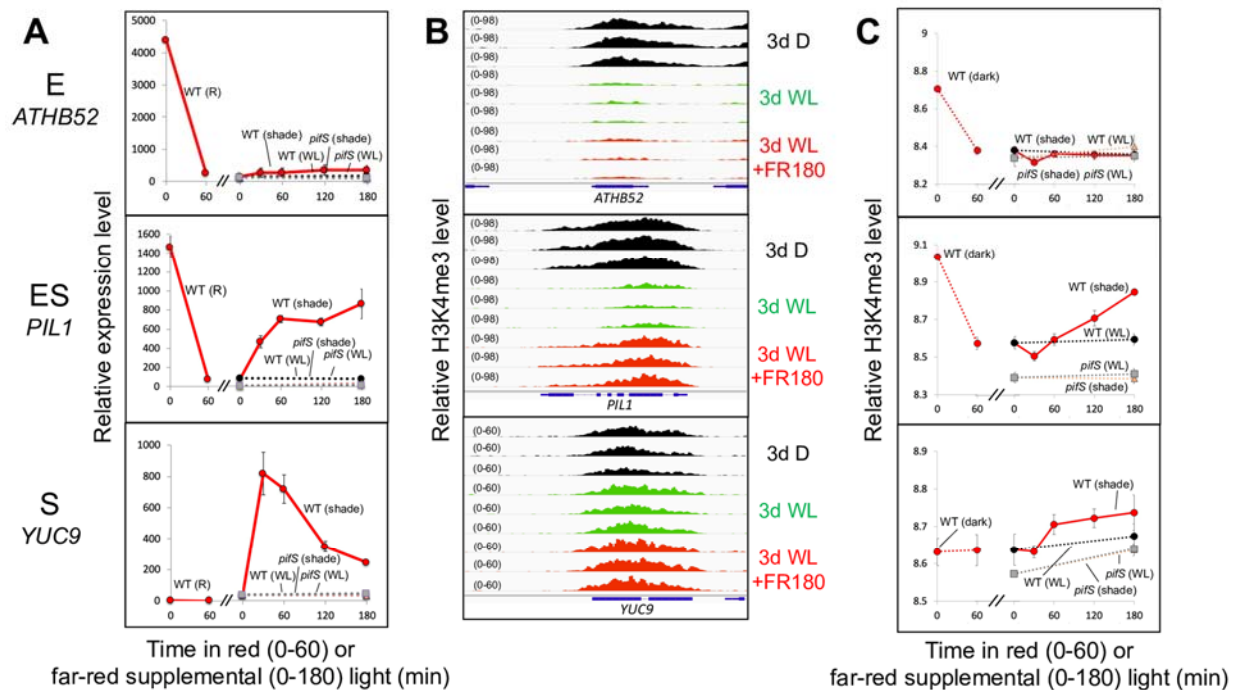

**Figure 3. Transcript levels are broadly correlated with H3K4me3 levels for PIF DTGs belonging to Etiolation-induced only (E), Etiolation and Shade-induced (ES) and Shade-induced only (S) classes. A)** Average relative transcript levels as measured by RNA-seq of *ATHB52* (E class, top), *PIL1* (ES class, middle) and *YUC9* (S class, bottom). Left subpanel shows the effect of 60 min red light on the transcript levels in 3-day-old dark-grown seedlings (wild-type, solid red line). Right subpanel shows the effect of 30, 60, 120 and 180 min of FR-enriched WL or continuous WL on transcript levels in 3-day-old WL-grown seedlings (wild-type, FR: solid red line; *pifS*, FR: dotted black line; wild-type, WL: dotted red line; *pifS*, WL: dotted gray line). Error bars indicate SE. **B)** H3K4me3 enrichment as measured by ChIP-seq of *ATHB52* (top), *PIL1* (middle) and *YUC9* (bottom) in 3-day-old dark-grown seedlings (3d D, black), 3-day-old WL-grown seedlings (3d WL, green) and 3-day-old WL-grown seedlings after 180 min of FR-enriched WL (3d WL +FR180, red). Data from each of three biological replicates are shown. **C)** Average relative H3K4me3 levels of *ATHB52* (top), *PIL1* (middle) and *YUC9* (bottom). Left subpanel shows the levels in 3-day-old dark-grown seedlings and the levels in 3-day-old WL-grown seedlings (wild-type, connected by dashed red line). Right subpanel shows the effect of 30, 60, 120 and 180 min of FR-enriched WL or continuous WL on transcript levels in 3-day-old WL-grown seedlings (wild-type, FR: solid red line; *pifS*, FR: dotted black line; wild-type, WL: dotted red line; *pifS*, WL: dotted gray line). Error bars indicate SE.

## 189 Discussion

190 As a prelude to exploring the role of epigenetic factors in light/shade-regulated gene  
 191 expression, we generated a set of 144 “high-confidence”, PIF-induced DTGs, that we identified  
 192 by integrating our newly obtained data with previously published analyses. This provided three  
 193 subclasses of PIF-DTGs, displaying three contrasting patterns of transcriptional responsiveness  
 194 to light and shade signals (E, ES and S) during young seedling development. By focusing on the  
 195 shade-responsiveness of these gene sets, we were able to concurrently assess whether differences

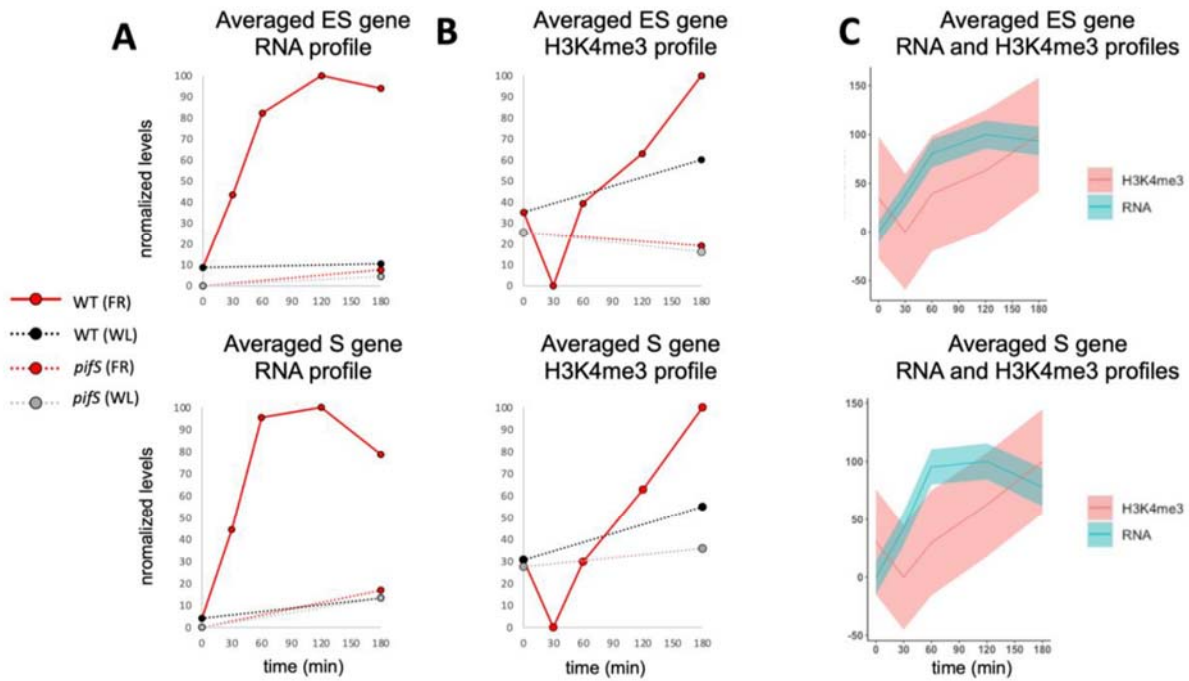

**Figure 4: Shade-induced, PIF-dependent increases in transcription precede corresponding increases in H3K4me3 for ES class and S class genes.** **A)** Normalized levels of the average transcript profile for all ES class genes (top) or S class genes during 180 minute shade-light (FR, red) or white-light (WL, black/gray) treatment for wild-type (WT, solid red/dashed black) or *pif5* (dashed red/dashed gray). **B)** Normalized levels of the average H3K4me3 profile for all ES class genes (top) or S class genes during 180 minute shade-light (FR, red) or white-light (WL, black/gray) treatment for wild-type (WT, solid red/dashed black) or *pif5* (dashed red/dashed gray). **C)** Overlays of the RNA (yellow) and H3K4me3 (blue) profiles from WT seedlings during the FR treatment. Shaded variance indicate normalized SE.

196 in the epigenetic landscape might be associated with the observed transcriptional pattern  
 197 differences, and whether comparison of the temporal patterns of shade-induced transcript and  
 198 H3K4me3 changes might indicate the potential sequence of such changes.

199 Broadly speaking our data are consistent with previous studies reporting that high  
 200 H3K4me3 levels are correlated with actively transcribing genes. However, comparison of our  
 201 integrated RNA-seq and ChIP-seq analyses over time following shade exposure, showed no clear  
 202 temporal coincidence of transcript and H3K4me3 levels. On the contrary, for the shade-induced  
 203 PIF DTGs, we found that, on average, transcript levels rise before their corresponding H3K4me3  
 204 levels rise (**Figure 4**). These results indicate that H3K4me3 plays little or no role in causing or  
 205 priming the rapid, shade-induced transcriptional responsiveness of these genes. Instead, the data  
 206 are more consistent with previous reports indicating that high levels of transcription from a given  
 207 locus leads to trimethylation of H3K4 (Le Martelot et al., 2012; Kuang et al., 2014).

208 Moreover, consideration of our current findings in the context of recent advances in  
 209 understanding chromatin involvement in controlling plant gene expression, suggests an  
 210 intriguing possible role for H3K4me3 in shade-regulated expression through the PIF-signaling  
 211 hub. Willige et al. (Willige et al., 2021) reported that shade rapidly (within 5 minutes) induces



212 the binding of PIF7 to the promoter of the *ATHB2* gene, and similarly rapidly triggers ejection of  
213 the histone variant H2A.Z, as well as increasing H3K9 acetylation (H3K9ac). These findings  
214 indicate that PIF7 occupancy of target gene promoters can shape the local chromatin status in  
215 response to shade. These changes preceded changes in gene expression, leading to the conclusion  
216 that chromatin remodeling is not a consequence of transcriptional activation. Given, firstly, that  
217 our data indicate, conversely to those of Willige et al. (Willige et al., 2021), that the shade-  
218 invoked, PIF-mediated induction of target gene expression appears to precede the increases in  
219 H3K4me3 levels at those genes; and secondly, that these H3K4me3 increases are considerably  
220 slower than both (a) the shade-induced increases in H3K9ac levels reported by Willige et al.  
221 (Willige et al., 2021), and (b) the light-triggered decrease of this mark in dark-grown seedlings  
222 observed by González-Grandío (González-Grandío et al., 2022), it appears that H3K4me3 may  
223 be a trailing indicator of the expression status of shade-induced genes. This conclusion raises the  
224 possibility that H3K4me3 may function to stabilize the active transcriptional state of these genes,  
225 thus providing a form of transcriptional memory (Foroozani et al., 2021) as a buffer against  
226 exposure to the rapid, random fluctuations between full sunlight and shade that occur within leaf  
227 canopies, as a result of breeze-induced movement under natural conditions. The mechanism by  
228 which PIF binding activates H3K4 trimethylation remains to be determined.

229 Collectively, these changes in chromatin landscape add another dimension of complexity  
230 to the multilayered network of mechanisms and pathways that regulate and intersect with the  
231 phy-PIF module. The phy family have dual photosensory and thermosensory functions,  
232 monitoring both light and temperature signals from the environment, that are then transduced  
233 through the PIFs (Leivar and Monte, 2014; Legris et al., 2016; Paik et al., 2017). In addition, the  
234 PIF family function as a signaling hub for multiple other signaling pathways, that include the  
235 core circadian oscillator, via the TOC1 component and its PRR relatives (Soy et al., 2016; Martín  
236 et al., 2018; Zhang et al., 2020), the hormones gibberellic acid, abscisic acid, jasmonic acid,  
237 ethylene and brassinosteroids (Leivar and Monte, 2014; Paik et al., 2017), as well as interacting  
238 with the blue-light photoreceptor, cryptochrome 2 (CRY2) (Más et al., 2000; Pedmale et al.,  
239 2016), and numerous other factors, which together are involved in a diversity of molecular  
240 functions, that include transcriptional and posttranscriptional modulation (Wang et al., 2021),  
241 phosphorylation, ubiquitination, and degradation. Moreover, many of these light-induced  
242 interactions appear to take place in nuclear photobodies (Legris et al., 2019), functioning either  
243 as a concentrated milieu of dynamically changing, multi-component complexes, driving  
244 enhanced intermolecular interactions (Wang et al., 2021), or as foci of sequestration, as shown  
245 for PIF7 (Willige et al., 2021).

246

## 247 **Materials and Methods**

### 248 **Plant growth and phenotyping**

249 All seeds were stratified for 4 days at 4° before germination. Germination was induced by  
250 3h of incubation under 30  $\mu\text{mol m}^{-2} \text{s}^{-1}$  WL at 21° followed by a 5 min saturating pulse of FR  
251 light. Seedlings were grown for 3 days at 21° in complete darkness or under 30  $\mu\text{mol m}^{-2} \text{s}^{-1}$  WL  
252 (R/FR = 6-8). For FR light treatment, seedlings were grown for 3 days in WL before exposing  
253 them to simulated shade (30  $\mu\text{mol m}^{-2} \text{s}^{-1}$ , R/FR ~ 0.3). R light was defined as 640-680 nm and  
254 FR was defined as 710-750nm.

255 Hypocotyl measurements were performed on seedlings grown at 23° for 2 days in WL  
256 and either exposed to simulated shade for 4 days or kept in constant WL for 4 days. Three  
257 independent biological replicates were performed, each of which involved the plating of at least

258 30 seeds of each genotype all on the same plate. Plates were photographed with a high-resolution  
259 camera and hypocotyl lengths were measured via ImageJ. Mean hypocotyl length of each  
260 genotype was determined by averaging the means of the three replicates. Standard error was  
261 determined by dividing the standard deviation between all three replicas by the square root of 3.  
262 Student's T-test was performed for determination of p-values.

263

### 264 **RNA-seq analysis**

265 RNA was isolated as described (Zhang et al., 2013). Total RNA was extracted from 3-  
266 day-old seedlings using a QIAshredder and RNeasy Plus Mini Kit (Qiagen) according to  
267 manufacturer's instructions. RNA libraries for sequencing were prepared at the Functional  
268 Genomics Laboratory at UC Berkeley using a KAPA RNA HyperPrep Kit (Roche) according to  
269 the manufacturer's instructions.

270 RNA libraries were sequenced by the Genomic Sequencing Facility at UC Berkeley.  
271 Multiplexed RNA libraries were sequenced by 100-bp paired-end sequencing over two lanes on  
272 a HiSeq4000.

273 For mapping and analysis of RNA-seq experiments, reads were mapped to the  
274 Arabidopsis genome (TAIR10) by TopHat (Trapnell et al., 2009) (max intron length = 3000,  
275 inner mean distance = 200, inner distance standard deviation = 100, minimal allowed intron size  
276 = 25). Assembled reads were counted using featureCounts (Liao et al., 2014) and differential  
277 expression was determined via DESeq2 (Love et al., 2014) ( $\log_2FC > 1$  or  $\log_2FC < -1$ ;  $p\text{-val} <$   
278  $0.05$ ).

279

### 280 **Generation of PIF DTG list and subcategorization into E, ES and S classes**

281 To identify PIF DTGs, we first imposed strict statistically-significant two-fold (SSTF)  
282 cutoffs and selected all 764 genes whose expression levels decreased in response to red light  
283 (Pfeiffer et al., 2014) and/or increased in response to shade-light (this study). We then further  
284 narrowed our list to include only those genes that show a dependence on PIFs for their  
285 expression by combining the previously published RNA-seq data from the *pifq* mutant grown in  
286 darkness (Pfeiffer et al., 2014), with our newly obtained RNA-seq data, obtained using the  
287 *pifq mutant (*pifS*) grown in WL and exposed to 3h shade-light. We selected only those  
288 genes that were SSTF induced in WT relative to their levels in the corresponding *pif* mutant. By  
289 filtering out those genes that were not among the 764 light-responsive genes identified above, we  
290 were left with 278 PIF-dependent, light-responsive genes. Selecting only those genes that were  
291 found to be bound by one or more PIF (Hornitschek et al., 2012; Oh et al., 2012; Zhang et al.,  
292 2013; Pfeiffer et al., 2014; Chung et al., 2020) yielded 169 genes (**Table 1**).*

293 We subcategorized genes into E, ES and S classes as in Leivar et al, 2012. Class E  
294 (formerly Class L) represents genes whose dark-grown wild-type transcript levels are both (a)  
295 SSTF higher than those in dark-grown *pifq* and (b) SSTF repressed by the initial red light (R)  
296 signal in WT. Although some Class E genes show a degree of re-induction in the shade, this is  
297 weaker (*i.e.* non-SSTF), and the PIF-dependency is less, than initially in the dark (**Figure 2**).  
298 Conversely, Class S (formerly Class R) represents genes that do display SSTF induction by  
299 shade-light, as well as PIF-dependent SSTF induction in the shade, but that do not exhibit a  
300 SSTF response to either: (a) the PIFs in dark-grown seedlings, or (b) red light exposure (**Figure**  
301 **2**). Finally, Class ES (formerly Class M) represents those genes that display SSTF, mutually-  
302 converse responsiveness to the onset of the light and shade-light signals, respectively, as well as  
303 PIF-dependent SSTF induction, both in the dark and in shade-light (**Figure 2**).

304 A subset of these E, ES and S class genes exhibited anomalous transcription profiles. We  
305 manually removed these 25 genes because they were either highly expressed in WL (6 genes),  
306 were induced, rather than repressed, by red light (16 genes), were lowly expressed (1 gene) or  
307 were otherwise likely to be artifactual (2 genes). The remaining 144 PIF DTGs were then  
308 resorted using relaxed cutoffs. Of the non-anomalous genes first categorized as S class, 38  
309 showed a R-dependent reduction ( $p < 0.1$ ) in transcript levels but were excluded from the ES  
310 class because they did not show a SSTF reduction in dark-grown *pifq* mutant relative to WT.  
311 These genes were reclassified as ES. Two E class genes were also reclassified as ES genes  
312 because they exhibited a statistically-significant upregulation in response to FR despite not being  
313 SSTF downregulated in the *pifS* mutant. Ultimately, we were left with 17 E genes, 56 ES genes  
314 and 71 S genes (**Table 1**).

315

### 316 **H3K4me3 ChIP-seq analysis**

317 DNA libraries were sequenced by the Genomic Sequencing Facility at UC Berkeley. The  
318 multiplexed DNA libraries were sequenced by 50-bp single-end sequencing over two lanes on a  
319 HiSeq4000.

320 For mapping and analysis of ChIP-seq experiments, reads were mapped to the  
321 Arabidopsis genome (TAIR10) by BowTie2 (Langmead and Salzberg, 2012) and uniquely-  
322 mapping reads were first used to call peaks using BayesPeak (Spyrou et al., 2009) (Bioconductor  
323 3.6; binsize = 300, peaks with a PP>0.999 in all 3 biological replicates) or MACS (Zhang et al.,  
324 2008). H3K4me3 peaks calculated using BayesPeak and MACS2 could only be unambiguously  
325 assigned to the transcriptional start sites (TSS) of 102 of the 144 E, ES, and S class genes. To  
326 ensure consistency in analysis, we therefore manually assigned peaks to all of the PIF DTGs by  
327 creating 300bp windows centered on the TSS.

328 To quantify the H3K4me3 peaks and measure differences between time points we used  
329 DiffBind (Ross-Innes et al., 2012) and DESeq2 (Love et al., 2014). Because the changes in  
330 magnitude of H3K4me3 levels were far smaller than the changes in transcript abundance, we  
331 used DESeq2 to calculate variance-stabilizing transformations (VSTs) across the time course  
332 experiment for both H3K4me3 levels and transcript levels. This enabled comparison of relative  
333 changes in H3K4me3 levels to the corresponding changes in transcription for a given gene or  
334 class of genes.

335

### 336 **Supplemental Data**

337

338 **Supplemental Table S1.** List of PIF-induced DTGs identified in this study and whether or not  
339 they have been previously identified as a PIF DTG.

340

### 341 **Funding**

342 This work was supported by NIH Grant 5R01GM047475-24 and US Department of Agriculture  
343 Agricultural Research Service Current Research Information System Grant 2030-21000-051-00D  
344 (to P.H.Q.). R.H.C. was supported by a USDA NIFA-AFRI postdoctoral fellowship (2017-  
345 67012-26105).

346

### 347 **Acknowledgements**

348 We thank Eduardo González-Grandío and James Tepperman for extensive discussions, critical  
349 feedback and for facilitating an excellent research environment. We also thank Alexander

350 Vergara and Martí Quevedo for assistance in analyzing ChIP data and Luis Cervela-Cardona for  
351 critical reading of the manuscript.

352

### 353 **Author Contributions**

354 RHC and PHQ designed the research. RHC, JD and YZ performed research. RHC, JD, YZ and  
355 PHQ analyzed data. RHC and PHQ wrote the paper.

356

### 357 **Figure 1. Phenotypic analysis of higher-order *pif* mutants in response to simulated shade.**

358 Hypocotyl lengths of wild-type (WT), *pifq*, *pifqipif6*, *pifqipif7* and *pifqipif6pif7* mutants grown for  
359 6 days in white light (WL) or 2 days in WL followed by 4 days in simulated shade (shade). Data  
360 represent the mean and SE from 3 biological replicates of 30 seedlings per genotype. Asterisks  
361 indicate that the hypocotyl lengths of shade-treated seedlings are statistically significantly  
362 different from the corresponding WLc controls by Student's t test ( $P < 0.05$ ). n.s. indicates “not  
363 significantly different” ( $P > 0.99$ ).

364

### 365 **Figure 2. PIF-activated direct target genes (DTGs) can be subdivided into three categories**

366 **based on their responses to red light and simulated shade.** Examples of transcript time course  
367 profiles for Etiolation-induced only (E) genes (BZIP3, ATHB2, HSD5 and GRF2), Etiolation  
368 and Shade-induced (ES) genes (PIL1, IAA19, IAA29 and ATHB2) and Shade-induced only (S)  
369 genes (YUC8, YUC9, At5g02865 and BG1) class genes. Left subpanel shows the effect of 60  
370 min red light on the transcript levels in 3-day-old dark-grown seedlings (wild-type, solid red  
371 line). Right subpanel shows the effect of 30, 60, 120 and 180 min of FR-enriched WL or  
372 continuous WL on transcript levels in 3-day-old WL-grown seedlings (wild-type, FR: solid red  
373 line; *pifS*, FR: dotted black line; wild-type, WL: dotted red line; *pifS*, WL: dotted gray line).  
374 Error bars indicate SE.

375

### 376 **Figure 3. Transcript levels are broadly correlated with H3K4me3 levels for PIF DTGs**

377 **belonging to Etiolation-induced only (E), Etiolation and Shade-induced (ES) and Shade-**  
378 **induced only (S) classes. A)** Average relative transcript levels as measured by RNA-seq of  
379 ATHB52 (E class, top), PIL1 (ES class, middle) and YUC9 (S class, bottom). Left subpanel  
380 shows the effect of 60 min red light on the transcript levels in 3-day-old dark-grown seedlings  
381 (wild-type, solid red line). Right subpanel shows the effect of 30, 60, 120 and 180 min of FR-  
382 enriched WL or continuous WL on transcript levels in 3-day-old WL-grown seedlings (wild-  
383 type, FR: solid red line; *pifS*, FR: dotted black line; wild-type, WL: dotted red line; *pifS*, WL:  
384 dotted gray line). Error bars indicate SE. **B)** H3K4me3 enrichment as measured by ChIP-seq of  
385 ATHB52 (top), PIL1 (middle) and YUC9 (bottom) in 3-day-old dark-grown seedlings (3d D,  
386 black), 3-day-old WL-grown seedlings (3d WL, green) and 3-day-old WL-grown seedlings after  
387 180 min of FR-enriched WL (3d WL +FR180, red). Data from each of three biological replicates  
388 are shown. **C)** Average relative H3K4me3 levels of ATHB52 (top), PIL1 (middle) and YUC9  
389 (bottom). Left subpanel shows the levels in 3-day-old dark-grown seedlings and the levels in 3-  
390 day-old WL-grown seedlings (wild-type, connected by dashed red line). Right subpanel shows  
391 the effect of 30, 60, 120 and 180 min of FR-enriched WL or continuous WL on transcript levels  
392 in 3-day-old WL-grown seedlings (wild-type, FR: solid red line; *pifS*, FR: dotted black line;  
393 wild-type, WL: dotted red line; *pifS*, WL: dotted gray line). Error bars indicate SE.

394

395 **Figure 4. Shade-induced, PIF-dependent increases in transcription precede corresponding**  
 396 **increases in H3K4me3 for ES class and S class genes. A)** Normalized levels of the average  
 397 transcript profile for all ES class genes (top) or S class genes (bottom) during 180 minute shade-  
 398 light (FR, red) or white-light (WL, black/gray) treatment for wild-type (WT, solid red/dashed  
 399 black) or *pifS* (dashed red/dashed gray). **B)** Normalized levels of the average H3K4me3 profile  
 400 for all ES class genes (top) or S class genes (bottom) during 180 minute shade-light (FR, red) or  
 401 white-light (WL, black/gray) treatment for wild-type (WT, solid red/dashed black) or *pifS*  
 402 (dashed red/dashed gray). **C)** Overlays of the RNA (blue) and H3K4me3 (red) profiles from WT  
 403 seedlings during the FR treatment. Shaded variance indicate normalized SE.

404  
 405 **Table 1 List of all candidate PIF DTGs and categorization into etiolation (E), shade (S) or**  
 406 **etiolation and shade (ES) responsive genes.**

| locus     | name      | R60  | pifQ | FR30 | FR60 | FR120 | FR180 | pS   | PIF bound | Original class | New class | Group | Pfeiffer class | known PIF DTG | ANOM |
|-----------|-----------|------|------|------|------|-------|-------|------|-----------|----------------|-----------|-------|----------------|---------------|------|
| AT5G02260 | EXP9      | 1.31 | 2.99 | -    | -    | -     | -     | -    | 157       | E              | E         | 1     | Ind            | yes           | N/A  |
| AT5G02580 | At5g02580 | 2.99 | 1.39 | -    | -    | -     | -     | -    | 13457     | E              | E         | 1     | Ind            | yes           | N/A  |
| AT5G67020 | At5g67020 | 2.28 | 1.21 | -    | -    | -     | -     | -    | 7         | E              | E         | 1     |                | yes           | N/A  |
| AT5G02190 | PCS1      | 2.27 | 1.19 | -    | -    | -     | -     | -    | 57        | E              | E         | 1     | Ind            | yes           | N/A  |
| AT1G07090 | LSH6      | 1.09 | 1.14 | -    | -    | -     | -     | -    | 13457     | E              | E         | 1     | Ind            | yes           | N/A  |
| AT1G67265 | DVL3      | 4.26 | 2.16 | -    | -    | -     | -     | -    | 1345      | E              | E         | 1     | Ind            | yes           | N/A  |
| AT1G60060 | At1g60060 | 2.14 | 2.03 | -    | -    | -     | -     | -    | 4         | E              | E         | 1     |                | yes           | N/A  |
| AT5G15830 | BZIP3     | 1.18 | 1.78 | -    | -    | -     | -     | -    | 5         | E              | E         | 1     |                | yes           | N/A  |
| AT4G37740 | GRF2      | 2.01 | 1.66 | -    | -    | -     | -     | -    | 14        | E              | E         | 1     | Ind            | yes           | N/A  |
| AT5G50175 | At5g50175 | 1.68 | 1.65 | -    | -    | -     | -     | -    | 14        | E              | E         | 1     | Ind            | yes           | N/A  |
| AT4G36010 | At4g36010 | 2.30 | 1.64 | -    | -    | -     | -     | -    | 134       | E              | E         | 1     | Ind            | yes           | N/A  |
| AT4G10020 | HSD5      | 1.23 | 1.64 | -    | -    | -     | -     | -    | 14        | E              | E         | 1     | Ind            | yes           | N/A  |
| AT3G25730 | EDF3      | 2.91 | 1.55 | -    | -    | -     | -     | -    | 3         | E              | E         | 1     |                | yes           | N/A  |
| AT3G28340 | GATL10    | 1.00 | 1.48 | -    | -    | -     | -     | -    | 15        | E              | E         | 1     | Ind            | yes           | N/A  |
| AT1G58410 | At1g58410 | 1.35 | 1.28 | -    | -    | -     | -     | -    | 14        | E              | E         | 1     |                | yes           | N/A  |
| AT3G53200 | MYB27     | 2.40 | 1.07 | -    | -    | -     | -     | -    | 14        | E              | E         | 1     | Ind            | yes           | N/A  |
| AT5G53980 | ATHB52    | 4.07 | 1.01 | -    | -    | -     | -     | -    | 35        | E              | E         | 1     | Ind            | yes           | N/A  |
| AT2G42870 | PAR1      | 2.31 | -    | -    | -    | -     | 2.14  | 2.34 | 13457     | S              | ES        | 2     |                | yes           | N/A  |
| AT3G59900 | ARGOS     | 1.01 | -    | -    | 1.62 | 1.90  | 1.84  | 2.13 | 14        | S              | ES        | 2     |                | yes           | N/A  |
| AT2G44910 | ATHB-4    | 2.10 | -    | 3.95 | 1.83 | 1.27  | -     | 1.50 | 13457     | S              | ES        | 2     |                | yes           | N/A  |
| AT5G28300 | GT2L      | 2.17 | -    | -    | -    | ***   | 1.19  | 1.47 | 13457     | S              | ES        | 2     |                | yes           | N/A  |
| AT1G13260 | RAV1      | 2.51 | -    | -    | -    | 1.22  | -     | 1.32 | 1345      | S              | ES        | 2     |                | yes           | N/A  |
| AT5G44260 | TZF5      | 3.69 | -    | -    | -    | 2.60  | 2.85  | 3.01 | 7         | S              | ES        | 2     |                | yes           | N/A  |
| AT5G02760 | APD7      | 1.70 | -    | -    | 3.23 | 3.53  | 2.95  | 2.50 | 45        | S              | ES        | 2     | Rep            | yes           | N/A  |
| AT5G62280 | At5g62280 | 1.96 | -    | -    | 2.70 | 3.11  | 2.74  | 2.34 | 7         | S              | ES        | 2     |                | yes           | N/A  |
| AT5G46330 | FLS2      | 1.52 | -    | -    | -    | -     | 1.62  | 1.74 | 57        | S              | ES        | 2     |                | yes           | N/A  |
| AT2G44080 | ARL       | 2.04 | -    | -    | -    | 1.68  | 1.46  | 1.41 | 45        | S              | ES        | 2     |                | yes           | N/A  |
| AT3G60390 | HAT3      | 1.51 | -    | 1.42 | 1.18 | -     | -     | -    | 1345      | S              | ES        | 3     |                | yes           | N/A  |

|           |           |      |      |      |      |      |      |      |       |    |    |       |     |     |     |
|-----------|-----------|------|------|------|------|------|------|------|-------|----|----|-------|-----|-----|-----|
| AT5G25190 | ESE3      | 1.83 | -    | -    | 1.24 | 2.13 | ***  | -    | 1345  | S  | ES | 3     | yes | N/A |     |
| AT1G25560 | EDF1      | 1.64 | -    | -    | -    | 1.25 | 1.05 | -    | 145   | S  | ES | 3     | no  | N/A |     |
| AT3G60520 | At3g60520 | 1.50 | -    | -    | -    | 1.49 | -    | -    | 45    | S  | ES | 3     | yes | N/A |     |
| AT4G28240 | BGL1      | 1.45 | -    | -    | ***  | 1.24 | 1.04 | -    | 457   | S  | ES | 3     | yes | N/A |     |
| AT2G45210 | SAUR36    | 1.19 | 1.25 | -    | -    | ***  | 1.05 | -    | 15    | E  | ES | 1     | Ind | yes | N/A |
| AT2G43060 | IBH1      | 1.56 | 1.44 | -    | -    | 1.04 | -    | -    | 13457 | ES | ES | 1 & 3 | Ind | yes | N/A |
| AT5G02540 | At5g02540 | 1.63 | 1.49 | -    | 2.50 | 5.38 | 6.26 | 5.74 | 13457 | ES | ES | 1 & 2 | Ind | yes | N/A |
| AT3G15540 | IAA19     | 1.46 | 1.63 | -    | 3.31 | 3.37 | 2.20 | 2.62 | 1345  | ES | ES | 1 & 2 | Ind | yes | N/A |
| AT3G21330 | At3g21330 | 3.11 | 1.65 | 2.52 | 4.25 | 4.00 | 3.90 | 3.52 | 1345  | ES | ES | 1 & 2 | Ind | yes | N/A |
| AT5G63650 | SNRK2.5   | 1.75 | 1.68 | -    | -    | 1.78 | 2.30 | 2.67 | 1345  | ES | ES | 1 & 2 | Ind | yes | N/A |
| AT5G07010 | ST2A      | 2.97 | 1.71 | -    | -    | -    | 2.06 | 2.87 | 13457 | ES | ES | 1 & 2 | Ind | yes | N/A |
| AT5G01790 | At5g01790 | 1.41 | 1.74 | -    | -    | 1.62 | 1.69 | 1.56 | 145   | ES | ES | 1 & 2 | Ind | yes | N/A |
| AT1G10550 | XTH33     | 1.05 | 1.75 | -    | -    | 1.21 | ***  | 1.25 | 13457 | ES | ES | 1 & 2 | Ind | yes | N/A |
| AT3G61830 | ARF18     | 1.63 | 1.78 | -    | -    | -    | 1.04 | 1.08 | 3     | ES | ES | 1 & 2 | Ind | yes | N/A |
| AT4G16780 | ATHB-2    | 2.97 | 1.97 | 3.69 | 3.03 | 2.91 | 2.85 | 2.69 | 13457 | ES | ES | 1 & 2 | Ind | yes | N/A |
| AT4G35720 | At4g35720 | 2.68 | 2.27 | -    | -    | 1.67 | 1.38 | 1.95 | 1345  | ES | ES | 1 & 2 | Ind | yes | N/A |
| AT4G14130 | XTR7      | 2.50 | 2.41 | -    | -    | 2.17 | 3.82 | 3.98 | 13457 | ES | ES | 1 & 2 | Ind | yes | N/A |
| AT4G32280 | IAA29     | 2.47 | 2.56 | -    | 4.51 | 4.72 | 4.25 | 5.40 | 1345  | ES | ES | 1 & 2 | Ind | yes | N/A |
| AT5G65800 | ACS5      | 2.04 | 2.73 | -    | 2.84 | -    | -    | -    | 145   | ES | ES | 1 & 2 | Ind | yes | N/A |
| AT4G31380 | FLP1      | 2.18 | 2.99 | -    | 3.00 | 3.82 | 3.22 | 4.20 | 1457  | ES | ES | 1 & 2 | yes | N/A |     |
| AT2G46970 | PIL1      | 4.26 | 5.56 | 2.35 | 2.95 | 2.94 | 3.25 | 4.62 | 13457 | ES | ES | 1 & 2 | Ind | yes | N/A |
| AT5G05965 | At5g05965 | 1.97 | 1.20 | -    | -    | ***  | -    | 1.62 | 1345  | E  | ES | 1     | Ind | yes | N/A |
| AT5G09970 | CYP78A7   | ***  | -    | -    | 1.31 | 1.78 | 1.01 | 1.98 | 1     | S  | ES | 2     | yes | N/A |     |
| AT1G21050 | At1g21050 | ***  | -    | -    | 1.49 | 1.49 | 1.58 | 1.43 | 1357  | S  | ES | 2     | yes | N/A |     |
| AT5G59010 | BSK1      | ***  | -    | -    | -    | 1.30 | ***  | 1.28 | 145   | S  | ES | 2     | yes | N/A |     |
| AT3G61460 | BRH1      | ***  | -    | -    | 1.35 | 1.39 | 1.29 | 1.21 | 13457 | S  | ES | 2     | yes | N/A |     |
| AT1G21830 | At1g21830 | ***  | -    | -    | 1.13 | 1.10 | ***  | 1.05 | 1345  | S  | ES | 2     | yes | N/A |     |
| AT3G50340 | At3g50340 | ***  | -    | -    | 2.48 | 2.17 | 1.41 | 1.32 | 5     | S  | ES | 2     | yes | N/A |     |
| AT1G54120 | At1g54120 | ***  | -    | -    | 1.58 | -    | -    | -    | 15    | S  | ES | 3     | no  | N/A |     |
| AT4G22780 | ACR7      | ***  | -    | -    | 1.08 | -    | -    | -    | 145   | S  | ES | 3     | yes | N/A |     |
| AT2G28400 | At2g28400 | ***  | -    | -    | -    | 1.15 | -    | -    | 3     | S  | ES | 3     | yes | N/A |     |
| AT4G25260 | PMEI7     | ***  | 2.16 | -    | -    | 1.47 | 1.25 | 1.62 | 145   | S  | ES | 2     | Ind | yes | N/A |
| AT5G46240 | KAT1      | ***  | -    | 1.55 | 2.15 | 1.77 | 1.62 | 1.77 | 14    | S  | ES | 2     | yes | N/A |     |
| AT5G18030 | SAUR21    | ***  | -    | 2.63 | 3.37 | 2.46 | 2.10 | 1.53 | 357   | S  | ES | 2     | yes | N/A |     |
| AT4G38860 | SAUR16    | ***  | -    | -    | 1.13 | -    | -    | -    | 135   | S  | ES | 3     | yes | N/A |     |
| AT1G02400 | GA2OX6    | ***  | -    | -    | -    | 1.89 | -    | -    | 1345  | S  | ES | 3     | yes | N/A |     |
| AT3G05640 | EGR1      | ***  | -    | -    | -    | 1.17 | -    | -    | 457   | S  | ES | 3     | no  | N/A |     |
| AT3G62070 | At3g62070 | ***  | 1.33 | -    | 1.53 | 1.05 | -    | -    | 5     | S  | ES | 3     | no  | N/A |     |
| AT1G29430 | SAUR62    | ***  | -    | 1.18 | 2.22 | 1.02 | -    | -    | 5     | S  | ES | 3     | no  | N/A |     |
| AT1G75450 | CKX5      | ***  | 1.66 | -    | -    | 1.68 | 2.04 | 1.96 | 13457 | S  | ES | 2     | Ind | yes | N/A |

|           |           |     |      |      |      |      |      |      |       |   |    |   |     |     |     |
|-----------|-----------|-----|------|------|------|------|------|------|-------|---|----|---|-----|-----|-----|
| AT5G18060 | SAUR23    | *** | 1.73 | -    | 3.00 | 2.53 | 2.14 | 2.18 | 157   | S | ES | 2 | Ind | yes | N/A |
| AT4G37770 | ACS8      | *** | 2.29 | -    | 4.62 | 4.64 | 4.96 | 5.52 | 7     | S | ES | 2 |     | yes | N/A |
| AT4G13790 | SAUR25    | *** | 3.24 | -    | 4.15 | -    | -    | -    | 15    | S | ES | 3 | Ind | yes | N/A |
| AT3G62090 | PIF6      | *** | 3.57 | -    | -    | 3.99 | 3.85 | 6.90 | 13457 | S | ES | 2 | Ind | yes | N/A |
| AT3G12820 | MYB10     | *** | 4.10 | -    | -    | 2.34 | 2.97 | 2.25 | 4     | S | ES | 2 |     | yes | N/A |
| AT3G21320 | At3g21320 | -   | -    | -    | 6.54 | 7.28 | 7.16 | 7.75 | 13457 | S | S  | 2 |     | yes | N/A |
| AT5G22500 | FAR1      | -   | -    | -    | -    | 2.31 | 3.50 | 3.44 | 145   | S | S  | 2 |     | yes | N/A |
| AT4G28720 | YUC8      | -   | -    | 1.36 | 2.19 | 2.36 | 2.55 | 2.88 | 13457 | S | S  | 2 |     | yes | N/A |
| AT1G04180 | YUC9      | -   | -    | 4.42 | 4.24 | 3.25 | 2.68 | 2.71 | 1345  | S | S  | 2 |     | yes | N/A |
| AT5G18050 | SAUR22    | -   | -    | -    | 3.89 | 3.34 | 3.01 | 2.58 | 157   | S | S  | 2 |     | yes | N/A |
| AT1G02350 | At1g02350 | -   | -    | -    | 3.31 | 2.81 | 2.98 | 2.20 | 13457 | S | S  | 2 |     | yes | N/A |
| AT5G66080 | APD9      | -   | -    | -    | 1.26 | 1.47 | 1.62 | 1.88 | 1457  | S | S  | 2 |     | yes | N/A |
| AT3G23030 | IAA2      | -   | -    | 1.29 | 2.32 | 2.29 | 1.98 | 1.73 | 1345  | S | S  | 2 |     | yes | N/A |
| AT5G47370 | HAT2      | -   | -    | 1.40 | 3.40 | 2.34 | 1.62 | 1.54 | 1345  | S | S  | 2 |     | yes | N/A |
| AT4G14560 | IAA1      | -   | -    | -    | 3.10 | 2.19 | 1.89 | 1.54 | 134   | S | S  | 2 |     | yes | N/A |
| AT5G25460 | DGR2      | -   | -    | -    | -    | ***  | 1.12 | 1.25 | 1357  | S | S  | 2 |     | yes | N/A |
| AT1G36940 | At1g36940 | -   | -    | -    | -    | 1.06 | ***  | 1.20 | 15    | S | S  | 2 |     | yes | N/A |
| AT3G23050 | IAA7      | -   | -    | -    | -    | -    | 1.13 | 1.01 | 1345  | S | S  | 2 |     | yes | N/A |
| AT2G23170 | GH3.3     | -   | -    | -    | 2.30 | 3.57 | 3.29 | 3.14 | 3     | S | S  | 2 |     | yes | N/A |
| AT5G12050 | BG1       | -   | -    | 2.93 | 3.56 | 3.36 | 2.87 | 2.28 | 57    | S | S  | 2 |     | yes | N/A |
| AT1G76610 | At1g76610 | -   | -    | -    | 2.44 | 2.51 | 2.04 | 1.96 | 7     | S | S  | 2 |     | yes | N/A |
| AT1G29465 | At1g29465 | -   | -    | -    | 1.77 | 2.75 | 2.50 | 1.63 | 5     | S | S  | 2 |     | no  | N/A |
| AT1G75500 | WAT1      | -   | -    | -    | ***  | 1.39 | 1.34 | 1.42 | 7     | S | S  | 2 |     | yes | N/A |
| AT1G21980 | PIP5K1    | -   | -    | -    | ***  | ***  | 1.24 | 1.28 | 3     | S | S  | 2 |     | yes | N/A |
| AT1G31880 | BRX       | -   | -    | -    | 1.32 | 1.52 | 1.09 | 1.10 | 4     | S | S  | 2 |     | yes | N/A |
| AT4G39800 | MIPS1     | -   | -    | -    | -    | 1.41 | 1.28 | 1.03 | 5     | S | S  | 2 |     | yes | N/A |
| AT1G67900 | At1g67900 | -   | -    | -    | 2.61 | 2.06 | 1.36 | 1.03 | 7     | S | S  | 2 |     | yes | N/A |
| AT5G16023 | DVL1      | -   | -    | -    | 2.48 | -    | -    | -    | 1345  | S | S  | 3 |     | yes | N/A |
| AT5G39860 | PRE1      | -   | -    | -    | 2.42 | -    | -    | -    | 157   | S | S  | 3 |     | yes | N/A |
| AT4G34760 | SAUR50    | -   | -    | -    | 1.08 | ***  | -    | -    | 145   | S | S  | 3 |     | yes | N/A |
| AT1G49780 | PUB26     | -   | -    | ***  | 1.06 | ***  | -    | -    | 13457 | S | S  | 3 |     | no  | N/A |
| AT4G32290 | At4g32290 | -   | -    | -    | 1.04 | ***  | ***  | -    | 15    | S | S  | 3 |     | no  | N/A |
| AT5G43890 | YUC5      | -   | -    | 2.14 | -    | -    | -    | -    | 145   | S | S  | 3 |     | yes | N/A |
| AT3G62100 | IAA30     | -   | -    | -    | 2.60 | 2.32 | -    | -    | 134   | S | S  | 3 |     | no  | N/A |
| AT4G37390 | GH3.2     | -   | -    | -    | 1.29 | 2.04 | -    | -    | 1345  | S | S  | 3 | Rep | yes | N/A |
| AT1G75490 | At1g75490 | -   | -    | -    | -    | 1.99 | -    | -    | 145   | S | S  | 3 | Rep | yes | N/A |
| AT4G24275 | At4g24275 | -   | -    | -    | 1.11 | 1.79 | 1.04 | -    | 14    | S | S  | 3 |     | no  | N/A |
| AT4G27280 | CMI1      | -   | -    | -    | 1.84 | 1.61 | -    | -    | 1     | S | S  | 3 |     | yes | N/A |
| AT4G27310 | BBX28     | -   | -    | -    | -    | 1.54 | 1.66 | -    | 13457 | S | S  | 3 |     | yes | N/A |
| AT5G59220 | HAI1      | -   | -    | -    | -    | 1.50 | -    | -    | 1345  | S | S  | 3 | Ind | yes | N/A |

|           |           |      |      |      |      |      |      |      |       |   |      |   |     |            |            |
|-----------|-----------|------|------|------|------|------|------|------|-------|---|------|---|-----|------------|------------|
| AT1G60190 | PUB19     | -    | -    | -    | -    | 1.45 | -    | -    | 13457 | S | S    | 3 | yes | N/A        |            |
| AT2G40610 | EXP8      | -    | -    | -    | -    | 1.44 | -    | -    | 1345  | S | S    | 3 | yes | N/A        |            |
| AT5G54510 | GH3.6     | -    | -    | -    | ***  | 1.27 | 1.04 | -    | 135   | S | S    | 3 | yes | N/A        |            |
| AT2G45420 | LBD18     | -    | -    | -    | -    | 1.24 | -    | -    | 1     | S | S    | 3 | no  | N/A        |            |
| AT5G60840 | At5g60840 | -    | -    | -    | ***  | 1.12 | ***  | -    | 13457 | S | S    | 3 | yes | N/A        |            |
| AT4G09890 | At4g09890 | -    | -    | -    | 1.30 | 1.12 | -    | -    | 145   | S | S    | 3 | yes | N/A        |            |
| AT5G62220 | GT18      | -    | -    | -    | -    | 1.09 | -    | -    | 15    | S | S    | 3 | yes | N/A        |            |
| AT3G19380 | PUB25     | -    | -    | -    | ***  | 1.08 | -    | -    | 1345  | S | S    | 3 | yes | N/A        |            |
| AT3G44310 | NIT1      | -    | -    | -    | -    | 1.07 | 1.25 | -    | 13457 | S | S    | 3 | yes | N/A        |            |
| AT5G16200 | At5g16200 | -    | -    | -    | -    | 1.03 | -    | -    | 15    | S | S    | 3 | no  | N/A        |            |
| AT1G21910 | DREB26    | -    | -    | -    | -    | 1.01 | ***  | -    | 15    | S | S    | 3 | yes | N/A        |            |
| AT3G03850 | SAUR26    | -    | -    | -    | 3.17 | -    | -    | -    | 5     | S | S    | 3 | yes | N/A        |            |
| AT3G03840 | SAUR27    | -    | -    | -    | 2.89 | -    | -    | -    | 5     | S | S    | 3 | yes | N/A        |            |
| AT2G18010 | SAUR10    | -    | -    | -    | 4.65 | 3.72 | 3.53 | -    | 5     | S | S    | 3 | yes | N/A        |            |
| AT3G03830 | SAUR28    | -    | -    | -    | 4.00 | 2.87 | -    | -    | 5     | S | S    | 3 | yes | N/A        |            |
| AT4G34770 | SAUR1     | -    | -    | -    | 2.31 | 2.13 | -    | -    | 5     | S | S    | 3 | yes | N/A        |            |
| AT1G29460 | SAUR65    | -    | -    | -    | 2.83 | 1.99 | 1.58 | -    | 5     | S | S    | 3 | yes | N/A        |            |
| AT1G29500 | SAUR66    | -    | -    | -    | 2.53 | 1.91 | -    | -    | 35    | S | S    | 3 | yes | N/A        |            |
| AT3G55840 | At3g55840 | -    | -    | -    | -    | 1.83 | -    | -    | 5     | S | S    | 3 | yes | N/A        |            |
| AT5G18020 | SAUR20    | -    | -    | 1.98 | 2.37 | 1.82 | 1.42 | -    | 357   | S | S    | 3 | yes | N/A        |            |
| AT1G29440 | SAUR63    | -    | -    | -    | 2.31 | 1.73 | -    | -    | 5     | S | S    | 3 | yes | N/A        |            |
| AT1G29450 | SAUR64    | -    | -    | -    | 2.51 | 1.70 | -    | -    | 5     | S | S    | 3 | yes | N/A        |            |
| AT1G52565 | At1g52565 | -    | -    | -    | -    | 1.68 | -    | -    | 5     | S | S    | 3 | no  | N/A        |            |
| AT1G69160 | WIP1      | -    | -    | -    | 1.41 | 1.26 | 1.20 | -    | 5     | S | S    | 3 | Rep | yes        | N/A        |
| AT5G18010 | SAUR19    | -    | 1.10 | -    | 3.28 | 2.68 | -    | 2.39 | 145   | S | S    | 2 | Ind | yes        | N/A        |
| AT3G50350 | At3g50350 | -    | 1.16 | -    | 1.12 | 1.99 | 1.15 | -    | 5     | S | S    | 3 | no  | N/A        |            |
| AT3G50800 | At3g50800 | -    | 1.20 | 1.97 | 2.47 | 2.77 | 2.25 | 2.03 | 13457 | S | S    | 2 | Ind | yes        | N/A        |
| AT1G04240 | IAA3      | -    | 1.22 | -    | 1.66 | -    | -    | -    | 1457  | S | S    | 3 | Ind | yes        | N/A        |
| AT1G76240 | At1g76240 | -    | 1.26 | -    | -    | 1.01 | 1.04 | 1.01 | 15    | S | S    | 2 | Ind | yes        | N/A        |
| AT1G18400 | BEE1      | -    | 1.30 | -    | 2.50 | 2.35 | 1.80 | 1.60 | 1345  | S | S    | 2 | Ind | yes        | N/A        |
| AT5G66580 | At5g66580 | -    | 1.32 | 2.35 | 3.63 | 2.60 | 1.67 | -    | 13457 | S | S    | 3 | Ind | yes        | N/A        |
| AT3G28857 | PRE5      | -    | 1.79 | -    | 3.28 | -    | -    | -    | 145   | S | S    | 3 | Ind | yes        | N/A        |
| AT2G14960 | GH3.1     | -    | 1.90 | -    | -    | 1.41 | -    | -    | 13    | S | S    | 3 | Ind | yes        | N/A        |
| AT1G06080 | ADS1      | -    | 2.01 | -    | -    | 3.18 | 3.94 | 4.13 | 4     | S | S    | 2 | yes | N/A        |            |
| AT5G66590 | At5g66590 | -    | 2.06 | -    | 1.40 | 1.27 | 1.03 | 1.05 | 13457 | S | S    | 2 | Ind | yes        | N/A        |
| AT1G16850 | At1g16850 | -    | 2.82 | -    | -    | 1.03 | -    | -    | 135   | S | S    | 3 | Ind | yes        | N/A        |
| AT2G31980 | CYS2      | 1.68 | 3.00 | -    | -    | -    | -    | -    | 37    | E | ANOM | 1 | N/A | High in WL |            |
| AT1G10560 | PUB18     | 1.51 | 2.06 | -    | -    | -    | -    | -    | 13457 | E | ANOM | 1 | Ind | N/A        | High in WL |
| AT1G11960 | At1g11960 | 1.32 | 1.21 | -    | -    | -    | -    | -    | 37    | E | ANOM | 1 | N/A | N/A        | High in WL |
| AT3G61680 | PLIP1     | 1.32 | 1.05 | -    | -    | -    | -    | -    | 7     | E | ANOM | 1 | N/A | N/A        | High in WL |



|           |           |      |      |      |      |      |      |      |       |    |      |       |     |     |             |
|-----------|-----------|------|------|------|------|------|------|------|-------|----|------|-------|-----|-----|-------------|
| AT1G77200 | At1g77200 | 2.31 | 1.80 | -    | -    | 1.29 | -    | -    | 1345  | ES | ANOM | 1 & 3 | Ind | N/A | High in WL  |
| AT1G36060 | TG        | 1.04 | 1.29 | -    | -    | -    | -    | -    | 5     | E  | ANOM | 1     | Ind | N/A | High in WL  |
| AT1G02340 | HFR1      | -    | 3.82 | 2.56 | 3.05 | 3.41 | 3.44 | 3.18 | 13457 | S  | ANOM | 2     | Ind | N/A | R-induced   |
| AT3G54200 | NHL39     | -    | 1.04 | -    | -    | 2.04 | 1.73 | 1.77 | 1345  | S  | ANOM | 2     |     | N/A | artifactual |
| AT1G69570 | CDF5      | -    | -    | -    | 2.21 | 2.32 | 2.08 | 1.55 | 13457 | S  | ANOM | 2     |     | N/A | artifactual |
| AT4G01680 | MYB55     | -    | -    | -    | -    | 1.13 | 1.28 | 1.22 | 145   | S  | ANOM | 2     |     | N/A | R-induced   |
| AT1G18710 | MYB47     | -    | -    | -    | 1.35 | 1.36 | -    | 1.02 | 1     | S  | ANOM | 2     |     | N/A | R-induced   |
| AT2G33380 | RD20      | -    | 3.08 | -    | -    | 2.66 | 2.39 | 2.24 | 34    | S  | ANOM | 2     | Ind | N/A | R-induced   |
| AT1G80130 | At1g80130 | -    | -    | -    | -    | 1.60 | 2.26 | 2.04 | 5     | S  | ANOM | 2     |     | N/A | R-induced   |
| AT5G54470 | BBX29     | -    | -    | -    | 2.69 | 2.81 | 2.88 | -    | 1345  | S  | ANOM | 3     | Ind | N/A | R-induced   |
| AT1G09350 | GOLS3     | -    | -    | -    | 1.91 | 2.10 | -    | -    | 13    | S  | ANOM | 3     |     | N/A | R-induced   |
| AT5G66110 | HIPP27    | -    | 1.15 | -    | -    | 1.65 | 1.67 | -    | 1     | S  | ANOM | 3     | Ind | N/A | low         |
| AT3G16800 | EGR3      | -    | -    | -    | 1.07 | 1.38 | 1.49 | -    | 1457  | S  | ANOM | 3     |     | N/A | R-induced   |
| AT1G73480 | MAGL4     | -    | -    | -    | -    | 1.37 | -    | -    | 145   | S  | ANOM | 3     |     | N/A | R-induced   |
| AT3G29575 | AFP3      | -    | 1.45 | -    | -    | 1.33 | -    | -    | 13457 | S  | ANOM | 3     | Ind | N/A | R-induced   |
| AT3G22830 | HSFA6B    | -    | 2.29 | -    | -    | 1.19 | -    | -    | 145   | S  | ANOM | 3     |     | N/A | R-induced   |
| AT3G57540 | REM4.1    | -    | -    | -    | -    | 1.08 | -    | -    | 1     | S  | ANOM | 3     |     | N/A | R-induced   |
| AT2G29440 | GST24     | -    | 2.56 | -    | -    | 1.04 | -    | -    | 1     | S  | ANOM | 3     | Ind | N/A | R-induced   |
| AT1G78440 | GA2OX1    | -    | -    | -    | 2.22 | 2.38 | 2.53 | -    | 57    | S  | ANOM | 3     |     | N/A | R-induced   |
| AT2G46790 | PRR9      | -    | -    | -    | -    | 1.85 | 2.28 | -    | 3     | S  | ANOM | 3     |     | N/A | R-induced   |
| AT1G09250 | AIF4      | -    | -    | -    | -    | 1.28 | -    | -    | 7     | S  | ANOM | 3     |     | N/A | R-induced   |

407

|                       |                                                                                                                                                 |
|-----------------------|-------------------------------------------------------------------------------------------------------------------------------------------------|
| <b>locus</b>          | gene locus                                                                                                                                      |
| <b>name</b>           | gene name, if present                                                                                                                           |
| <b>R60</b>            | log2FC of transcript levels after exposure of 3-day-old dark-grown seedlings exposed to 60 minutes of R light                                   |
| <b>pifQ</b>           | log2FC of transcript levels in 3-day-old dark-grown pifq mutant seedlings relative to WT                                                        |
| <b>FR30</b>           | log2FC of transcript levels in 3-day-old WL-grown seedlings exposed to 30 min supplemental FR                                                   |
| <b>FR60</b>           | log2FC of transcript levels in 3-day-old WL-grown seedlings exposed to 60 min supplemental FR                                                   |
| <b>FR120</b>          | log2FC of transcript levels in 3-day-old WL-grown seedlings exposed to 120 min supplemental FR                                                  |
| <b>FR180</b>          | log2FC of transcript levels in 3-day-old WL-grown seedlings exposed to 180 min supplemental FR                                                  |
| <b>pS</b>             | log2FC of transcript levels in 3-day-old WL-grown pifS relative to 3-day-old WL-grown WT exposed to 180 min supplemental FR                     |
| <b>PIF bound</b>      | confirmed binding by PIF1, PIF3, PIF4, PIF5 and/or PIF7                                                                                         |
| <b>Original class</b> | original categorized class (E, ES or S)                                                                                                         |
| <b>New class</b>      | New class after resorting: E, ES, S or anomalous (ANOM)                                                                                         |
| <b>Group</b>          | Initial Group categorization (see below)                                                                                                        |
| <b>ANOM</b>           | rationale for inclusion in "anomalous" category                                                                                                 |
| <b>Pfeiffer class</b> | If described in Pfeiffer et al., 2014, Mol Plant: Induced or Repressed                                                                          |
| <b>known PIF</b>      |                                                                                                                                                 |
| <b>DTG</b>            | From Supplemental Table 1                                                                                                                       |
| -                     | indicates no SSTF changes in transcript levels                                                                                                  |
| ***                   | indicates statistically-significant 1.5-fold change (p-val < 0.1; used only for recategorization)                                               |
| 4.72                  | indicates statistically-significant 26.4-fold (2 <sup>4.72101552</sup> ) change for the indicated comparison                                    |
| Group 1               | genes SSTF downregulated by R light <b>AND</b> SSTF downregulated in pifq <b>AND</b> PIF-bound (1, 3, 4, 5 and/or 7)                            |
| Group 2               | genes SSTF upregulated by FR light (30, 60, 120 and/or 180min) <b>AND</b> SSTF downregulated in pifS <b>AND</b> PIF-bound (1, 3, 4, 5 and/or 7) |

Group 3 genes SSTF upregulated by FR light (30, 60 and/or 120min) **AND** PIF-bound (PIF1, 3, 4, 5 and/or 7)

408  
409

## Parsed Citations

- Al-Sady B, Kikis EA, Monte E, Quail PH (2008) Mechanistic duality of transcription factor function in phytochrome signaling. Proc Natl Acad Sci U S A 105: 2232-2237**  
Google Scholar: [Author Only](#) [Title Only](#) [Author and Title](#)
- Bernstein BE, Humphrey EL, Erlich RL, Schneider R, Bouman P, Liu JS, Kouzarides T, Schreiber SL (2002) Methylation of histone H3 Lys 4 in coding regions of active genes. Proc Natl Acad Sci U S A 99: 8695-8700**  
Google Scholar: [Author Only](#) [Title Only](#) [Author and Title](#)
- Bourbousse C, Ahmed I, Roudier F, Zabulon G, Blondet E, Balzergue S, Colot V, Bowler C, Barneche F (2012) Histone H2B monoubiquitination facilitates the rapid modulation of gene expression during Arabidopsis photomorphogenesis. PLoS Genet 8: e1002825**  
Google Scholar: [Author Only](#) [Title Only](#) [Author and Title](#)
- Bourbousse C, Barneche F, Laloi C (2019) Plant Chromatin Catches the Sun. Front Plant Sci 10: 1728**  
Google Scholar: [Author Only](#) [Title Only](#) [Author and Title](#)
- Charron JB, He H, Elling AA, Deng XW (2009) Dynamic landscapes of four histone modifications during deetiolation in Arabidopsis. Plant Cell 21: 3732-3748**  
Google Scholar: [Author Only](#) [Title Only](#) [Author and Title](#)
- Chung BYW, Balcerowicz M, Di Antonio M, Jaeger KE, Geng F, Franaszek K, Marriott P, Brierley I, Firth AE, Wigge PA (2020) An RNA thermoswitch regulates daytime growth in Arabidopsis. Nat Plants 6: 522-532**  
Google Scholar: [Author Only](#) [Title Only](#) [Author and Title](#)
- Dalton JC, Bätz U, Liu J, Curie GL, Quail PH (2016) A Modified Reverse One-Hybrid Screen Identifies Transcriptional Activation Domains in PHYTOCHROME-INTERACTING FACTOR 3. Front Plant Sci 7: 881**  
Google Scholar: [Author Only](#) [Title Only](#) [Author and Title](#)
- de Lucas M, Davière JM, Rodríguez-Falcón M, Pontin M, Iglesias-Pedraz JM, Lorrain S, Fankhauser C, Blázquez MA, Titarenko E, Prat S (2008) A molecular framework for light and gibberellin control of cell elongation. Nature 451: 480-484**  
Google Scholar: [Author Only](#) [Title Only](#) [Author and Title](#)
- de Wit M, Ljung K, Fankhauser C (2015) Contrasting growth responses in lamina and petiole during neighbor detection depend on differential auxin responsiveness rather than different auxin levels. New Phytol 208: 198-209**  
Google Scholar: [Author Only](#) [Title Only](#) [Author and Title](#)
- Ding Y, Ndamukong I, Xu Z, Lapko H, Fromm M, Avramova Z (2012) ATX1-generated H3K4me3 is required for efficient elongation of transcription, not initiation, at ATX1-regulated genes. PLoS Genet 8: e1003111**  
Google Scholar: [Author Only](#) [Title Only](#) [Author and Title](#)
- Fiorucci AS, Bourbousse C, Concia L, Rougée M, Deton-Cabanillas AF, Zabulon G, Layat E, Latrasse D, Kim SK, Chaumont N, Lombard B, Stroebel D, Lemoine S, Mohammad A, Blugeon C, Loew D, Bailly C, Bowler C, Benhamed M, Barneche F (2019) Arabidopsis S2Lb links AtCOMPASS-like and SDG2 activity in H3K4me3 independently from histone H2B monoubiquitination. Genome Biol 20: 100**  
Google Scholar: [Author Only](#) [Title Only](#) [Author and Title](#)
- Fisher AJ, Franklin KA (2011) Chromatin remodelling in plant light signalling. Physiol Plant 142: 305-313**  
Google Scholar: [Author Only](#) [Title Only](#) [Author and Title](#)
- Foroozani M, Vandal MP, Smith AP (2021) H3K4 trimethylation dynamics impact diverse developmental and environmental responses in plants. Planta 253: 4**  
Google Scholar: [Author Only](#) [Title Only](#) [Author and Title](#)
- González-Grandío E, Álamos S, Zhang Y, Dalton-Roesler J, Niyogi KK, García HG, Quail PH (2022) Chromatin Changes in Phytochrome Interacting Factor-Regulated Genes Parallel Their Rapid Transcriptional Response to Light. Front Plant Sci 13: 803441**  
Google Scholar: [Author Only](#) [Title Only](#) [Author and Title](#)
- Hornitschek P, Kohnen MV, Lorrain S, Rougemont J, Ljung K, López-Vidriero I, Franco-Zorrilla JM, Solano R, Trevisan M, Pradervand S, Xenarios I, Fankhauser C (2012) Phytochrome interacting factors 4 and 5 control seedling growth in changing light conditions by directly controlling auxin signaling. Plant J 71: 699-711**  
Google Scholar: [Author Only](#) [Title Only](#) [Author and Title](#)
- Huq E, Al-Sady B, Hudson M, Kim C, Apel K, Quail PH (2004) Phytochrome-interacting factor 1 is a critical bHLH regulator of chlorophyll biosynthesis. Science 305: 1937-1941**  
Google Scholar: [Author Only](#) [Title Only](#) [Author and Title](#)
- Huq E, Quail PH (2002) PIF4, a phytochrome-interacting bHLH factor, functions as a negative regulator of phytochrome B**

**signaling in Arabidopsis. EMBO J 21: 2441-2450**

Google Scholar: [Author Only](#) [Title Only](#) [Author and Title](#)

**Khanna R, Huq E, Kikis EA, Al-Sady B, Lanzatella C, Quail PH (2004) A novel molecular recognition motif necessary for targeting photoactivated phytochrome signaling to specific basic helix-loop-helix transcription factors. Plant Cell 16: 3033-3044**

Google Scholar: [Author Only](#) [Title Only](#) [Author and Title](#)

**Kuang Z, Cai L, Zhang X, Ji H, Tu BP, Boeke JD (2014) High-temporal-resolution view of transcription and chromatin states across distinct metabolic states in budding yeast. Nat Struct Mol Biol 21: 854-863**

Google Scholar: [Author Only](#) [Title Only](#) [Author and Title](#)

**Langmead B, Salzberg SL (2012) Fast gapped-read alignment with Bowtie 2. Nat Methods 9: 357-359**

Google Scholar: [Author Only](#) [Title Only](#) [Author and Title](#)

**Le Martelot G, Canella D, Symul L, Migliavacca E, Gilardi F, Liechti R, Martin O, Harshman K, Delorenzi M, Desvergne B, Herr W, Deplancke B, Schibler U, Rougemont J, Guex N, Hernandez N, Naef F, Consortium C (2012) Genome-wide RNA polymerase II profiles and RNA accumulation reveal kinetics of transcription and associated epigenetic changes during diurnal cycles. PLoS Biol 10: e1001442**

Google Scholar: [Author Only](#) [Title Only](#) [Author and Title](#)

**Legris M, Ince Y, Fankhauser C (2019) Molecular mechanisms underlying phytochrome-controlled morphogenesis in plants. Nat Commun 10: 5219**

Google Scholar: [Author Only](#) [Title Only](#) [Author and Title](#)

**Legris M, Klose C, Burgie ES, Rojas CC, Neme M, Hiltbrunner A, Wigge PA, Schäfer E, Vierstra RD, Casal JJ (2016) Phytochrome B integrates light and temperature signals in Arabidopsis. Science 354: 897-900**

Google Scholar: [Author Only](#) [Title Only](#) [Author and Title](#)

**Leivar P, Monte E (2014) PIFs: systems integrators in plant development. Plant Cell 26: 56-78**

Google Scholar: [Author Only](#) [Title Only](#) [Author and Title](#)

**Leivar P, Monte E, Al-Sady B, Carle C, Storer A, Alonso JM, Ecker JR, Quail PH (2008) The Arabidopsis phytochrome-interacting factor PIF7, together with PIF3 and PIF4, regulates responses to prolonged red light by modulating phyB levels. Plant Cell 20: 337-352**

Google Scholar: [Author Only](#) [Title Only](#) [Author and Title](#)

**Leivar P, Monte E, Oka Y, Liu T, Carle C, Castillon A, Huq E, Quail PH (2008) Multiple phytochrome-interacting bHLH transcription factors repress premature seedling photomorphogenesis in darkness. Curr Biol 18: 1815-1823**

Google Scholar: [Author Only](#) [Title Only](#) [Author and Title](#)

**Leivar P, Quail PH (2011) PIFs: pivotal components in a cellular signaling hub. Trends Plant Sci 16: 19-28**

Google Scholar: [Author Only](#) [Title Only](#) [Author and Title](#)

**Leivar P, Tepperman JM, Cohn MM, Monte E, Al-Sady B, Erickson E, Quail PH (2012) Dynamic antagonism between phytochromes and PIF family basic helix-loop-helix factors induces selective reciprocal responses to light and shade in a rapidly responsive transcriptional network in Arabidopsis. Plant Cell 24: 1398-1419**

Google Scholar: [Author Only](#) [Title Only](#) [Author and Title](#)

**Leivar P, Tepperman JM, Monte E, Calderon RH, Liu TL, Quail PH (2009) Definition of early transcriptional circuitry involved in light-induced reversal of PIF-imposed repression of photomorphogenesis in young Arabidopsis seedlings. Plant Cell 21: 3535-3553**

Google Scholar: [Author Only](#) [Title Only](#) [Author and Title](#)

**Li L, Ljung K, Breton G, Schmitz RJ, Pruneda-Paz J, Cowing-Zitron C, Cole BJ, Ivans LJ, Pedmale UV, Jung HS, Ecker JR, Kay SA, Chory J (2012) Linking photoreceptor excitation to changes in plant architecture. Genes Dev 26: 785-790**

Google Scholar: [Author Only](#) [Title Only](#) [Author and Title](#)

**Liao Y, Smyth GK, Shi W (2014) featureCounts: an efficient general purpose program for assigning sequence reads to genomic features. Bioinformatics 30: 923-930**

Google Scholar: [Author Only](#) [Title Only](#) [Author and Title](#)

**Liu N, Fromm M, Avramova Z (2014) H3K27me3 and H3K4me3 chromatin environment at super-induced dehydration stress memory genes of Arabidopsis thaliana. Mol Plant 7: 502-513**

Google Scholar: [Author Only](#) [Title Only](#) [Author and Title](#)

**Liu X, Chen CY, Wang KC, Luo M, Tai R, Yuan L, Zhao M, Yang S, Tian G, Cui Y, Hsieh HL, Wu K (2013) PHYTOCHROME INTERACTING FACTOR3 associates with the histone deacetylase HDA15 in repression of chlorophyll biosynthesis and photosynthesis in etiolated Arabidopsis seedlings. Plant Cell 25: 1258-1273**

Google Scholar: [Author Only](#) [Title Only](#) [Author and Title](#)

**Love MI, Huber W, Anders S (2014) Moderated estimation of fold change and dispersion for RNA-seq data with DESeq2. *Genome Biol* 15: 550**

Google Scholar: [Author Only](#) [Title Only](#) [Author and Title](#)

**Martín G, Rovira A, Veciana N, Soy J, Toledo-Ortiz G, Gommers CMM, Boix M, Henriques R, Minguet EG, Alabadí D, Halliday KJ, Leivar P, Monte E (2018) Circadian Waves of Transcriptional Repression Shape PIF-Regulated Photoperiod-Responsive Growth in *Arabidopsis*. *Curr Biol* 28: 311-318.e315**

Google Scholar: [Author Only](#) [Title Only](#) [Author and Title](#)

**Martínez-García JF, Moreno-Romero J (2020) Shedding light on the chromatin changes that modulate shade responses. *Physiol Plant* 169: 407-417**

Google Scholar: [Author Only](#) [Title Only](#) [Author and Title](#)

**Mizuno T, Oka H, Yoshimura F, Ishida K, Yamashino T (2015) Insight into the mechanism of end-of-day far-red light (EODFR)-induced shade avoidance responses in *Arabidopsis thaliana*. *Biosci Biotechnol Biochem* 79: 1987-1994**

Google Scholar: [Author Only](#) [Title Only](#) [Author and Title](#)

**Monte E, Tepperman JM, Al-Sady B, Kaczorowski KA, Alonso JM, Ecker JR, Li X, Zhang Y, Quail PH (2004) The phytochrome-interacting transcription factor, PIF3, acts early, selectively, and positively in light-induced chloroplast development. *Proc Natl Acad Sci U S A* 101: 16091-16098**

Google Scholar: [Author Only](#) [Title Only](#) [Author and Title](#)

**Más P, Devlin PF, Panda S, Kay SA (2000) Functional interaction of phytochrome B and cryptochrome 2. *Nature* 408: 207-211**

Google Scholar: [Author Only](#) [Title Only](#) [Author and Title](#)

**Ni M, Tepperman JM, Quail PH (1998) PIF3, a phytochrome-interacting factor necessary for normal photoinduced signal transduction, is a novel basic helix-loop-helix protein. *Cell* 95: 657-667**

Google Scholar: [Author Only](#) [Title Only](#) [Author and Title](#)

**Oh E, Zhu JY, Wang ZY (2012) Interaction between BZR1 and PIF4 integrates brassinosteroid and environmental responses. *Nat Cell Biol* 14: 802-809**

Google Scholar: [Author Only](#) [Title Only](#) [Author and Title](#)

**Paik I, Kathare PK, Kim JI, Huq E (2017) Expanding Roles of PIFs in Signal Integration from Multiple Processes. *Mol Plant* 10: 1035-1046**

Google Scholar: [Author Only](#) [Title Only](#) [Author and Title](#)

**Pedmale UV, Huang SC, Zander M, Cole BJ, Hetzel J, Ljung K, Reis PAB, Sridevi P, Nito K, Nery JR, Ecker JR, Chory J (2016) Cryptochromes Interact Directly with PIFs to Control Plant Growth in Limiting Blue Light. *Cell* 164: 233-245**

Google Scholar: [Author Only](#) [Title Only](#) [Author and Title](#)

**Penfield S, Josse EM, Halliday KJ (2010) A role for an alternative splice variant of PIF6 in the control of *Arabidopsis* primary seed dormancy. *Plant Mol Biol* 73: 89-95**

Google Scholar: [Author Only](#) [Title Only](#) [Author and Title](#)

**Perrella G, Kaiserli E (2016) Light behind the curtain: photoregulation of nuclear architecture and chromatin dynamics in plants. *New Phytol* 212: 908-919**

Google Scholar: [Author Only](#) [Title Only](#) [Author and Title](#)

**Pfeiffer A, Shi H, Tepperman JM, Zhang Y, Quail PH (2014) Combinatorial complexity in a transcriptionally centered signaling hub in *Arabidopsis*. *Mol Plant* 7: 1598-1618**

Google Scholar: [Author Only](#) [Title Only](#) [Author and Title](#)

**Pham VN, Kathare PK, Huq E (2018) Phytochromes and Phytochrome Interacting Factors. *Plant Physiol* 176: 1025-1038**

Google Scholar: [Author Only](#) [Title Only](#) [Author and Title](#)

**Quail PH, Boylan MT, Parks BM, Short TW, Xu Y, Wagner D (1995) Phytochromes: photosensory perception and signal transduction. *Science* 268: 675-680**

Google Scholar: [Author Only](#) [Title Only](#) [Author and Title](#)

**Ross-Innes CS, Stark R, Teschendorff AE, Holmes KA, Ali HR, Dunning MJ, Brown GD, Gojis O, Ellis IO, Green AR, Ali S, Chin SF, Palmieri C, Caldas C, Carroll JS (2012) Differential oestrogen receptor binding is associated with clinical outcome in breast cancer. *Nature* 481: 389-393**

Google Scholar: [Author Only](#) [Title Only](#) [Author and Title](#)

**Sakamoto K, Nagatani A (1996) Nuclear localization activity of phytochrome B. *Plant J* 10: 859-868**

Google Scholar: [Author Only](#) [Title Only](#) [Author and Title](#)

**Soy J, Leivar P, González-Schain N, Martín G, Diaz C, Sentandreu M, Al-Sady B, Quail PH, Monte E (2016) Molecular convergence of clock and photosensory pathways through PIF3-TOC1 interaction and co-occupancy of target promoters. *Proc Natl Acad Sci U***

**S A 113: 4870-4875**

Google Scholar: [Author Only](#) [Title Only](#) [Author and Title](#)

**Spyrou C, Stark R, Lynch AG, Tavaré S (2009) BayesPeak: Bayesian analysis of ChIP-seq data. BMC Bioinformatics 10: 299**

Google Scholar: [Author Only](#) [Title Only](#) [Author and Title](#)

**Tepperman JM, Zhu T, Chang HS, Wang X, Quail PH (2001) Multiple transcription-factor genes are early targets of phytochrome A signaling. Proc Natl Acad Sci U S A 98: 9437-9442**

Google Scholar: [Author Only](#) [Title Only](#) [Author and Title](#)

**Trapnell C, Pachter L, Salzberg SL (2009) TopHat: discovering splice junctions with RNA-Seq. Bioinformatics 25: 1105-1111**

Google Scholar: [Author Only](#) [Title Only](#) [Author and Title](#)

**Wang X, Jiang B, Gu L, Chen Y, Mora M, Zhu M, Noory E, Wang Q, Lin C (2021) A photoregulatory mechanism of the circadian clock in Arabidopsis. Nat Plants 7: 1397-1408**

Google Scholar: [Author Only](#) [Title Only](#) [Author and Title](#)

**Willige BC, Zander M, Yoo CY, Phan A, Garza RM, Trigg SA, He Y, Nery JR, Chen H, Chen M, Ecker JR, Chory J (2021) PHYTOCHROME-INTERACTING FACTORS trigger environmentally responsive chromatin dynamics in plants. Nat Genet 53: 955-961**

Google Scholar: [Author Only](#) [Title Only](#) [Author and Title](#)

**Zhang X, Bernatavichute YV, Cokus S, Pellegrini M, Jacobsen SE (2009) Genome-wide analysis of mono-, di- and trimethylation of histone H3 lysine 4 in Arabidopsis thaliana. Genome Biol 10: R62**

Google Scholar: [Author Only](#) [Title Only](#) [Author and Title](#)

**Zhang Y, Liu T, Meyer CA, Eeckhoutte J, Johnson DS, Bernstein BE, Nusbaum C, Myers RM, Brown M, Li W, Liu XS (2008) Model-based analysis of ChIP-Seq (MACS). Genome Biol 9: R137**

Google Scholar: [Author Only](#) [Title Only](#) [Author and Title](#)

**Zhang Y, Mayba O, Pfeiffer A, Shi H, Tepperman JM, Speed TP, Quail PH (2013) A quartet of PIF bHLH factors provides a transcriptionally centered signaling hub that regulates seedling morphogenesis through differential expression-patterning of shared target genes in Arabidopsis. PLoS Genet 9: e1003244**

Google Scholar: [Author Only](#) [Title Only](#) [Author and Title](#)

**Zhang Y, Pfeiffer A, Tepperman JM, Dalton-Roesler J, Leivar P, Gonzalez Grandio E, Quail PH (2020) Central clock components modulate plant shade avoidance by directly repressing transcriptional activation activity of PIF proteins. Proc Natl Acad Sci U S A 117: 3261-3269**

Google Scholar: [Author Only](#) [Title Only](#) [Author and Title](#)
